# Supplementary material for: Vertical profiles of light absorption and scattering associated with black-carbon particle fractions in the springtime Arctic above 79° N
Source: Copernicus journal article supplement (doi:10.5194/acp-2019-785), 2019-09-11
Supplement: Supplementary file [file Hansen Kapustin (1991 - in Russian) BC at Wrangel Island - Izvestiya A....pdf › Hansen Kapustin (1991 - in Russian) BC at Wrangel Island - Izvestiya A....pdf]

УДК 551.510.42

© 1991 г.

Э.Д.Э. ХЭНСЕН, В.Н. КАПУСТИН, А.В. ПОЛИССАР

РЕЗУЛЬТАТЫ ИЗМЕРЕНИЙ КОНЦЕНТРАЦИИ  
УГЛЕРОДСОДЕРЖАЩЕГО АЭРОЗОЛЯ В АТМОСФЕРЕ  
ВОСТОЧНОЙ АРКТИКИ

С 27.III по 21.V 1989 г. в Восточной части Советской Арктики на полярной станции "Остров Врангеля" ( $70^{\circ} 58' N$ ,  $178^{\circ} 33' W$ ) проводился отбор проб атмосферного аэрозоля. Затем по величине ослабления света пробой, для каждой пробы определялась концентрация сажи в приземном слое атмосферы. Было получено лишь 17 представительных проб, характеризующих фоновый арктический воздух: во всех остальных случаях имелся вклад от локальных источников загрязнения атмосферы. При отсутствии вклада от локальных источников загрязнения атмосферы концентрация аэрозольной сажи в воздухе для данного периода времени равнялась  $10-100 \text{ нг/м}^3$ , что согласуется с аналогичными данными для Аляски и севера Канады. Полученные пробы атмосферного аэрозоля анализировались сначала в Москве, а затем в Беркли. Соответствие результатов было достаточно хорошим.

**Введение.** Наличие углеродсодержащего аэрозоля в атмосфере связано с процессами сгорания топлива, что приводит к выбросу в атмосферу большого количества аэрозольного элементного углерода (сажи), который характеризуется микроструктурой, аналогичной структуре графита. Коэффициент эмиссии аэрозоля этого типа, определяемый отношением массы сажи в атмосфере к массе углерода в сжигаемом топливе, может меняться от  $10^{-2}$  для неполного сгорания до  $10^{-6}$  для хорошо контролируемого сгорания. Благодаря малому размеру и химической инертности, частицы сажи переносятся на значительные расстояния. По данным многолетних наблюдений, аэрозоль этого типа присутствует в атмосфере Арктики [1-3], фоновых океанских регионов [4, 5], Антарктиды [6]. Частицы сажи хорошо поглощают видимый свет и поэтому оказывают влияние на радиационный баланс атмосферы. Кроме того, выпадая на снег, они уменьшают альбедо снежного покрова и влияют на процессы таяния снега в Арктике. Поэтому для определения пространственных и временных вариаций концентрации, источников и путей переноса сажи в атмосфере, а также оценки скорости осаждения аэрозоля этого типа на поверхность снега и льда, актуальны и важны измерения концентрации сажи в воздухе для различных регионов.

Для реализации исследований в этой области была разработана совместная советско-американская программа, связанная с соглашением между правительствами США и СССР в области охраны окружающей среды (проект 02.08-12). На полярной станции "Остров Врангеля" в восточной части Советской Арктики (рис. 1) был установлен разработанный в США аэрозольный пробоотборник, при помощи которого весной 1989 г. в течение 2 мес осуществлялся круглосуточный отбор проб атмосферного аэрозоля. Полученные пробы анализировались в советской и американской лабораториях

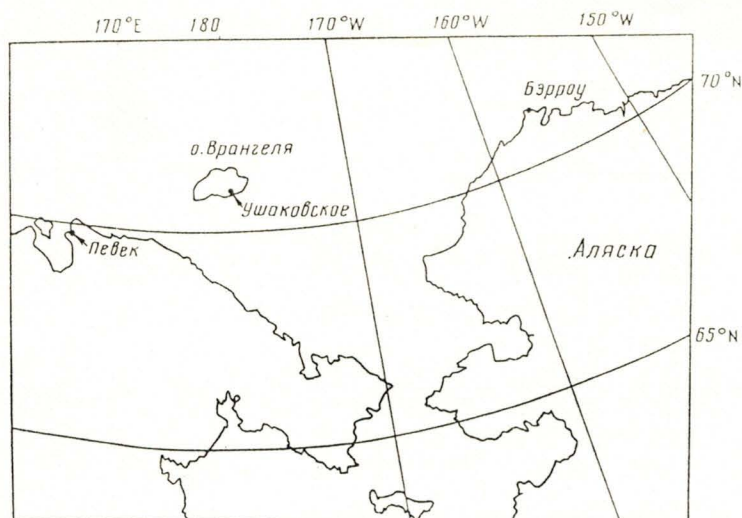

Рис. 1. Местоположение полярной станции "Остров Врангеля" и обсерватории Геофизического мониторинга климатических изменений в Бэрроу на Аляске

оптическим методом [7, 8]. Соответствующие результаты, приведенные ниже, согласуются с аналогичными результатами для Западной Арктики.

**Описание эксперимента.** Применявшийся аэрозольный пробоотборник разрабатывался специально для эксплуатации в экспедиционных условиях. Он состоял из мало-мощного мембранного насоса, узла держателя фильтра, позволяющего быстро менять фильтры, механического счетчика общего объема прокачанного воздуха и электронного счетчика объема воздуха, прокачанного сквозь данную пробу. Прибор был смонтирован в жестком корпусе, снабженном двумя вентиляторами для охлаждения. Наличие маски в держателе фильтра позволяло выбирать требуемую площадь аэрозольной пробы. Она могла равняться 0,5, 1, 2 или 5 см<sup>2</sup>. Типичная скорость прокачки воздуха составляла 1 м<sup>3</sup>/ч, время отбора каждой пробы менялось от 3 до 60 ч, что будет обсуждаться ниже.

Все аэрозольные пробы отбирались на предварительно отоженные фильтры из кварцевых волокон. Эти фильтры обладают следующими преимуществами. Они имеют достаточно малое сопротивление потоку воздуха и поэтому могут работать при высокой скорости прокачки воздуха через фильтр (до 10 м/с). Это особенно важно при отборе проб атмосферного аэрозоля в фоновых районах. Чистый фильтр этого типа практически не содержит углерода, и полученная на нем проба может анализироваться термическим или химическим методом без какого-либо влияния материала подложки. Оптические свойства подложки из кварцевых волокон таковы, что рассеяние света на аэрозольных частицах практически не изменяет пропускание света фильтром с аэрозо-лем [7]. Как было показано ранее [8], поверхностная концентрация сажи на фильтре из кварцевых волокон пропорциональна оптическому пропусканию фильтра с аэрозо-лем. При концентрации сажи на поверхности фильтра 5 мкг/см<sup>2</sup> интенсивность света, прошедшего через фильтр, при переходе от чистого фильтра к фильтру с аэрозо-лем изменяется приблизительно в  $e$  раз.

**Результаты интеркалибровки.** Полученные пробы упаковывались в специальные кассеты и по окончании экспедиции на остров Врангеля сначала анализировались в Институте физики атмосферы АН СССР в Москве. Физическая и химическая стабильность сажи позволяет не принимать специальных мер предосторожности при упаковке образцов, их хранении и перевозке. Всего проанализировано 76 проб. По степени ослабления света пробой определялась массовая концентрация сажи на каждом фильтре. Затем все пробы были отправлены в Беркли для выполнения аналогичной процедуры,



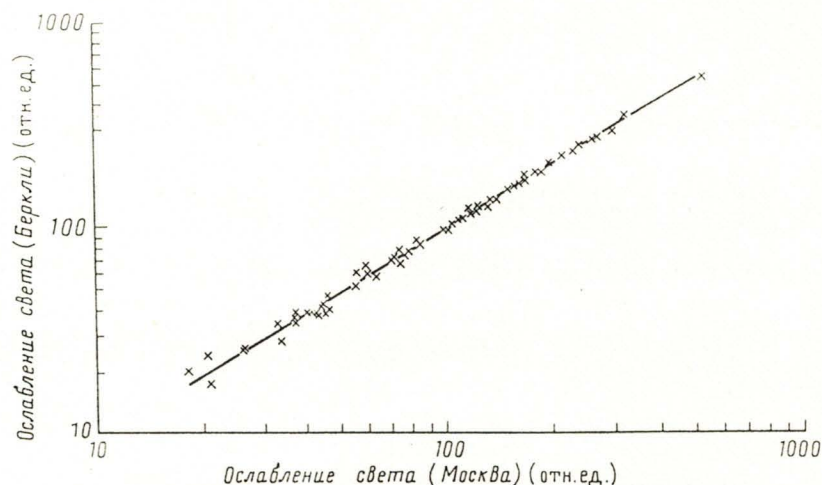

Рис. 2. Результаты интеркалибровки приборов оптического анализа. Коэффициент корреляции 0,997, наклон прямой 1,059

поскольку одна из задач настоящей работы заключалась в проведении интеркалибровки. В Беркли был выполнен повторный анализ, и соответствие полученных в обоих случаях данных было достаточно хорошим (рис. 2).

Метод измерений основан на определении относительной величины ослабления света аэрозолем на фильтре из кварцевых волокон.

Известно, что для интенсивности света, прошедшего через фильтр с аэрозолем, справедливо следующее соотношение [7, 8]:

$$I_1 = I_0 \exp(-\sigma' C),$$

где  $I_0$  — интенсивность света, прошедшего через чистый фильтр,  $C$  — массовая поверхностная концентрация сажи на фильтре,  $\text{мкг/см}^2$ , а коэффициент  $\sigma'$  при прочих равных условиях определяется функциями источника света и фотоприемника и не зависит от концентраций сажи на фильтре. Таким образом, за исключением случая, когда измерения проводятся на одной длине волны (например, если в качестве источника света используется лазер), аппаратуру для анализа необходимо калибровать по фильтрам с известной концентрацией сажи. Соотношение между ослаблением света и поверхностной концентрацией элементарного углерода будет выглядеть следующим образом:

$$C = \frac{100}{\sigma} \ln \frac{I_0}{I_1},$$

где коэффициент 100 введен для упрощения расчетов.

Методика анализа заключалась в измерении пропускания света чистым участком фильтра ( $I_0$ ), затем — участком с аэрозолем ( $I_1$ ). Вычислив по формуле (6) поверхностную концентрацию сажи на фильтре  $C$  и зная объем воздуха, прошедшего через фильтр и площадь пробы, можно определить объемную концентрацию сажи в воздухе.

Калибровка измерительной системы в Москве проводилась по тому же набору фильтров, которые использовались и в Беркли. При использовании соответствующих значений  $\sigma$  наблюдалось хорошее согласие обоих наборов данных (рис. 2) для достаточно большого диапазона значений ослабления (коэффициент корреляции 0,997). Коэффициент  $\sigma$  для измерительной системы ИФА на 6% выше коэффициента для прибора Лоуренсовской лаборатории. Проведя такую интеркалибровку, можно обеспечить достаточную точность измерений массовой концентрации сажи на фильтрах из кварцевых волокон как в Беркли, так и в Москве.

Проблема вклада от местных источников загрязнения атмосферы. Задача оператора

Характеристики проб фонового аэрозоля для острова Врангеля

| Начало отбора (GMT) |       | Длительность отбора, ч | Ветер направление (град.) скорость (м/с) |       | Коэффициент ослабления света | Концентрация сажи*, нг/м <sup>3</sup> |
|---------------------|-------|------------------------|------------------------------------------|-------|------------------------------|---------------------------------------|
| дата                | время |                        |                                          |       |                              |                                       |
| 05.04               | 11    | 22                     | 360-80                                   | 1-6   | 47                           | 105                                   |
| 13.04               | 2     | 18                     | 360-15                                   | 10-22 | 42                           | 60                                    |
| 13.04               | 21    | 11                     | 360-170                                  | 4-16  | 22                           | 52                                    |
| 15.04               | 7     | 36                     | 30-125                                   | 5-10  | 40                           | 55                                    |
| 16.04               | 19    | 39                     | 360-70                                   | 5-15  | 27                           | 34                                    |
| 18.04               | 10    | 26                     | 15-40                                    | 9-13  | 42                           | 44                                    |
| 19.04               | 13    | 35                     | 340-30                                   | 6-14  | 45                           | 33                                    |
| 20.04               | 23    | 37                     | 330-60                                   | 14-20 | 45                           | 33                                    |
| 22.04               | 12    | 36                     | 350-10                                   | 7-14  | 42                           | 30                                    |
| 01.05               | 5     | 36                     | 10-60                                    | 2-7   | 61                           | 42                                    |
| 08.05               | 9     | 26                     | 30-110                                   | 4-8   | 25                           | 22                                    |
| 09.05               | 13    | 60                     | 20-110                                   | 3-9   | 45                           | 18                                    |
| 12.05               | 0     | 49                     | 360-90                                   | 2-8   | 36                           | 17                                    |
| 16.05               | 3     | 36                     | 25-80                                    | 4-10  | 36                           | 27                                    |
| 17.05               | 16    | 45                     | 60-120                                   | 3-5   | 33                           | 31                                    |
| 19.05               | 13    | 49                     | 60-120                                   | 3-10  | 21                           | 13                                    |
| 21.05               | 4     | 19                     | 50-80                                    | 2-6   | 27                           | 32                                    |

\* Данные анализа в Москве.

на острове Врангеля заключалась в получении проб фонового арктического аэрозоля, когда отсутствует вклад от местных источников загрязнения атмосферы. Такие пробы ниже будем называть представительными. Местные источники загрязнения атмосферы (дизельные электростанции, котельные) находились по отношению к точке отбора проб в направлениях 230-320° на расстоянии менее одного километра. Поэтому важно было выделить те моменты, когда ветер дул из "чистого" сектора и вклад от местных источников отсутствовал. При постоянстве ветра этого направления время отбора проб выбиралось порядка 24 ч, что обеспечивало набор достаточного количества аэрозольного вещества и получение более точных измерений. При непостоянстве ветра по направлению длительность отбора каждой пробы уменьшалась. Анализ показал, что при наличии вклада от местных источников концентрация сажи в атмосфере возрастала в 10-100 раз по сравнению с фоновыми ситуациями. Результаты измерений и сопутствующие метеоданные позволили с большой вероятностью выявить пробы, для которых имел место вклад от местных источников. Из полученных 76 проб лишь 17 являлись представительными (таблица).

**Обсуждение результатов.** Из вышесказанного следует, что рассмотренная методика отбора проб атмосферного аэрозоля и анализа проб на элементный углерод сажу позволяет проводить измерения в фоновых районах. Хорошее согласие данных, полученных в обеих лабораториях ИФА и Беркли, дает возможность выполнять программы совместных исследований. Поскольку сажа переносится на большие расстояния в любые районы Земли, отработка надежной методики анализа, дающей эквивалентные данные для различных измерительных систем, очень важна и актуальна для выяснения источников и путей переноса антропогенного аэрозоля в глобальном масштабе.

Проблема влияния местных источников загрязнения атмосферы на острове Врангеля достаточно актуальна. Однако ранее было показано [6], что даже в очень "чистых" районах, таких как Антарктида, существует возможность получения точных данных без какого-либо влияния местных источников загрязнения атмосферы, если использовать прибор, измеряющий концентрацию сажи в реальном масштабе времени. В этом случае данные, где имеется вклад от местного источника, легко определяются и исключаются из непрерывной записи, поэтому при использовании в Арктике прибора, рабо-



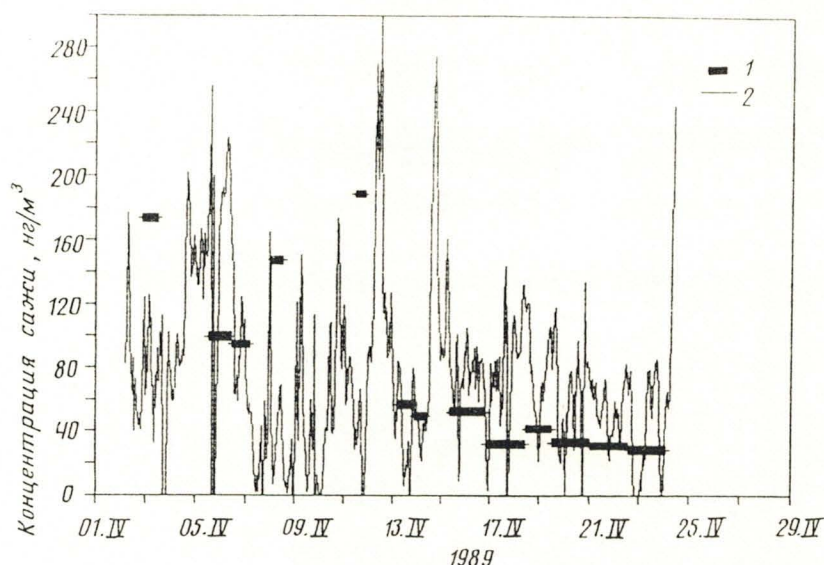

Рис. 3. Зависимость концентрации сажи в приземном слое от времени для острова Врангеля (1) и Бэрроу, Аляска (2)

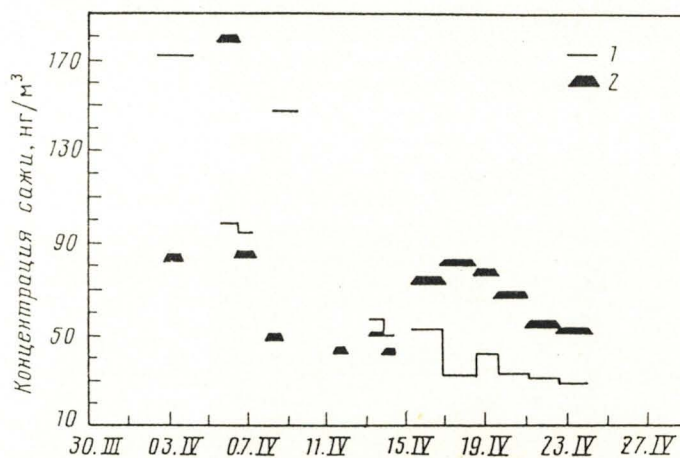

Рис. 4. Зависимость концентрации сажи в приземном слое от времени для острова Врангеля (1) и Бэрроу, Аляска (2). Данные для Аляски усреднены в соответствии с длительностями отбора проб на острове Врангеля

тающего в реальном масштабе времени, можно будет получать более полную информацию о концентрации сажи в атмосфере.

Анализ тех немногих представительных проб, которые характеризуют фоновый арктический воздух, показал, что полученные значения концентрации сажи сравнимы с аналогичными значениями для Западной Арктики для этого времени года. Лаборатория мониторинга климатических изменений в Бэрроу, Аляска, ведет непрерывные измерения концентрации сажи с разрешением в 1 ч. На рис. 3 приведены зависимости концентрации сажи в приземном слое от времени для острова Врангеля и Бэрроу, Аляска. Аналогичные результаты с соответствующим усреднением данных для Аляски приведены на рис. 4. Из графиков и таблицы видно, что при ветре из северо-западного сектора (со стороны Аляски) концентрация сажи в приземном слое над остро-

вом Врангеля меньше. В перспективе предполагается детально сравнить значения концентрации для этих двух точек наблюдений (расстояние между ними равно приблизительно 700 км) и с помощью траекторного анализа выявить те дни, когда траектория воздушной массы проходила через обе эти точки. Это позволит построить модель переноса аэрозоля над плоской поверхностью ледового покрова океана.

**Выводы.** С марта по май 1989 г. в восточной части Советской Арктики на острове Врангеля отбирали пробы атмосферного аэрозоля. Длительность отбора каждой пробы менялась от 3 до 60 ч. Полученные пробы анализировались на элементный углерод (сажу) в Москве и Беркли. Данные измерений хорошо согласуются между собой. Несмотря на наличие вклада от местных источников загрязнения атмосферы для большего числа проб, 17 проб были представительными, характеризующими фоновый арктический воздух в данной точке наблюдений. Соответствующая этим пробам концентрация аэрозольного элементного углерода (сажи) в воздухе равнялась 10–100 нг/м<sup>3</sup>, что согласуется с аналогичными данными для Западной Арктики. Получение более полной информации о концентрации сажи в приземном слое воздуха на о. Врангеля и ее сравнение с аналогичными данными для Бэрроу, Аляска, позволит построить модель переноса аэрозоля этого типа в Арктике.

Авторы благодарны А.И. Воскресенскому и В.Ф. Радионову за организацию и помощь в проведении экспедиции на остров Врангеля и полезное обсуждение ее результатов. Настоящая работа стала возможна благодаря Межправительственному соглашению в области охраны окружающей среды между СССР и США (Рабочая группа 8), и авторы выражают благодарность участникам переговоров. Выполненная в США часть настоящей работы была сделана благодаря Агентству Национальных Климатических Программ по проекту 9MGC400-8RIC0300. Один из авторов, А.Д.А. Хансен, благодарит коллектив Института физики атмосферы за гостеприимство во время его визитов в Москву, в результате которых и была разработана данная программа исследований.

#### СПИСОК ЛИТЕРАТУРЫ

1. *Rahn K.A.* Arctic air chemistry special issue // *Atm. Env.* 1981. V. 15. P. 1345–1516.
2. *Schell R.C.* Arctic Hase special issue. // *Geophys. Res. Lett.* 1984. V. 11. P. 359–472.
3. *Barrie L.A.* Arctic air pollution: an overvieo of current knowledge // *Atm. Env.* 1986. V. 20. P. 643–663.
4. *Andreae M.O.* Soot carbon and excess potassium: long-range transport of combustion-derived aerosol // *Science*. 1983. V. 220. P. 1148–1151.
5. *Clarke A.D.* Aerosol light absorption by soot in remote environments // *Aerosol Sci. Technol.* 1989. V. 10. P. 161–171.
6. *Hansen A.D.A., Bodhaine B.A., Dutton E.G., Schnell R.C.* Aerosol black carbon measurements of the South Pole: initial results 1986–1987 // *Geophys. Res. Lett.* 1988. V. 15. P. 1193–1196.
7. *Rosen H., Novakov T.* Optical transmission through aerosol deposits on diffusely reflective filters a method for measuring the absorbing component of aerosol particles // *Appl. Opt.* 1983. V. 22. P. 1265–1267.
8. *Gundel L.A., Dod R.L., Rosen J., Novakov T.* The relationship between optical attenuation and black carbon concentration for ambient and source particles // *Sci. Tot. Environ.* 1984. V. 36. P. 197–202.

Лоуреновская лаборатория  
Калифорнийского университета, США;  
Институт физики атмосферы АН СССР

Поступила в редакцию  
26.VI.1990.  
после доработки  
30.XI.1990



A.D.A. HANSEN, V.N. KAPUSTIN, A.D. POLISSAR  
MEASUREMENTS OF CARBONACEOUS AEROSOLS  
IN THE EASTERN ARCTIC

From March 27 to May 21, 1989 atmospheric aerosol samples were collected at the Polar Station on Wrangel Island in the Eastern Soviet Arctic ( $70^{\circ}58'N$ ,  $178^{\circ}33'W$ ). The samples were then analysed by an optical transmission technique to determine the concentration of aerosol soot near the surface. Although many samples show evidence of contamination from local combustion sources, 20 samples are believed to represent the background Arctic air. Aerosol soot concentrations deduced from these samples ranged from 10 to 100 nanograms per cubic meter, values that are comparable with those measured in the Alaskan and Canadian Arctic. An intercomparison of the results of the analysis of the samples in laboratories in the USA and USSR show excellent agreement.
